# Supplementary material for: Collagen polarization promotes epithelial elongation by stimulating locoregional cell proliferation
Source: eLife. 2021 Oct 18;10:e67915. doi: 10.7554/eLife.67915 (PMC8550756; doi:10.7554/eLife.67915)
Supplement: Figure 1—source data 1. [file elife-67915-fig1-data1.xlsx]

## Sheet: 1D
	Ki67 positive cell (%)
Aggregate	Non-elongating area	Elongating area
1	13.3465	37.5723
2	34.8416	56.5574
3	16.8571	75.5556
4	27.0758	43.1718
5	27.2109	40.9639
6	27.8997	57.3604
7	37.013	54.717
8	8.92857	37.1795
9	3.84615	29.1667
10	5.55556	16.6667
11	27.6923	62
12	8.47458	15.625
13	5.97826	31.3433
14	19.3548	38.6207
15	0	18.4466
Mean	17.6	41
SEM	3.05	4.55

## Sheet: 1F
	Cell division frequency (division/cell)
Aggregate	Non-elongating area	Elongating area
1	0.205479	0.387755
2	0.464286	0.521008
3	0.215517	0.516854
4	0.25641	0.160714
5	0.078125	0.333333
6	0.113636	0.214286
7	0.155556	0.230769
8	0.0987654	0.145455
9	0.0847458	0.348837
10	0.138889	0.343284
11	0.153846	0.159091
12	0.145455	0.173913
Mean	0.1759	0.2946
SEM	0.03052	0.0389

## Sheet: 1G
	Symmetry ratio
Aggregate	day 0	day1	day2	day3
1	1.08288	1.06628	1.77215	3.16112
2	1.15403	1.10067	1.20118	1.39629
3	1.12667	1.28261	1.46628	1.36108
4	1.16074	1.15868	2.26448	2.94338
5	1.30251	1.32392	1.12647	2.49452
6	1.03803	1.10548	1.03785	6.40282
7	1.15483	1.04665	1.05754
8	1.05092	1.14362	1.07519	1.81798
9	1.09402	1.0799	1.31485	2.35266
10	1.20509	1.02431	1.10548	1.43538
11	1.20726	1.12421	1.01657	1.09109
12	1.03414	1.16167	1.03618	2.21044
13	1.25558	1.32957	1.32101	1.46433
14	1.11829	1.2877	1.4575	1.74244
15	1.22972	1.51621	1.16722	2.28512
16	1.08219	1.56923	1.03618	2.65236
17	1.21909	1.32645	1.94036	2.0708
18	1.0645	1.00787	1.40665	2.66979
19	1.09731	1.13541	1.26913	1.14671
20	1.31629	1.2109	1.34897	1.6392
21		1.05203	2.79976	2.30088
22		1.09799	1.20568	2.27095
23		1.06948	1.45458	2.24419
24		1.26225	1.33439	3.58439
25		1.12495	1.68214
26		1.13055	1.91845
27		3.68402	1.13827
28		1.3939
29		1.00102
30		1.71
31		1.00889
32		2.42886
Mean	1.15	1.311	1.406	2.293
SEM	0.01915	0.0908	0.08148	0.2307

## Sheet: 1H
	Ki67 positive cells (%)
Aggregate	day 0	day1	day2	day3
1	0	0	29.3333	4.83871
2	0	0	12	18.3673
3	0	0	32.1429	3.7037
4	0	0	12.5	6.38298
5	0	6.45161	0	5.47945
6	1.6129	0	6.25	26.8156
7	0	7.24638	6.66667	33.2353
8	0	0	15	13.4454
9	0	0	3.22581	22.1893
10	0	0	0	2.46305
11	0	0	0	21.0526
12	0	0	4.34783	5.10204
13	0	0	3.84615	4.21456
14	0	0	0	10.8959
15	0	2.04082	0	9.54198
16	0	3.84615	2.85714	24.2222
17	0	11.4286	4.7619	6.83761
18	0	0	0	8.23529
19	0	0	2.32558	5.19481
20	0	0	3.52941	2.98507
21		0	9.67742	4.36242
22		0	1.92308	12.093
23		4	12.963	5.08475
24		3.44828	3.53982
25		0	48.8372
26		0	3.52941
27		1.66667	17.8571
28		9.375
29		0
30		5.55556
31		3.57143
32		9.52381
MEAN	0.08065	2.13	8.782	11.16
SEM	0.08065	0.5952	2.235	1.837

## Sheet: 1K
	Ki67 positive cell (%)
Aggregate	Control day1	Control day8	Mitomycin C day8	Aphidicolin day8
1	5	15.8205	3.84615	3.57143
2	2.94118	42.5656	0	10.5263
3	4.34783	36.7925	6.66667	5.55556
4	0	34.3254	0	15
5	0	32.1739	0	2.85714
6	0	39.1473	0	7.14286
7	6.06061	46.0064	4	19
8	4.87805	17.8862	3.22581	4.34783
9	14.2857	11.8421	6.25	35.8491
10	0	7.40741	2.5
11	0	42.6087	4.16667
12	0	12.9032	17.8571
13	0	21.0177	15.3846
14	0	19.8276	3.125
15	0	19.0625	6.66667
16	0		0
17	0		0
18	0		0
19	0		0
20	8
Mean	2.276	26.63	3.878	11.54
SEM	0.8547	3.338	1.175	3.546

## Sheet: 1L
	Symmetry ratio
Aggregate	Control day1	Control day8	Mitomycin C day8	Aphidicolin day8
1	1.24183	5.11111	2.42857	3.33333
2	1.3072	4.7	1.57143	1.71429
3	1.22623	2.5	1.42857	0.9
4	1.25837	3.54545	1.66667	1.57143
5	1.3704	3.55556	1	3.57143
6	1.16129	17.5	1.25	2.85714
7	1.00174	5.16667	1	2.875
8	1.12226	2	1.16667	6.6
9	1.25627	17.9333	1.14286	3
10	1.24302	6.0625	3.33333	3.44444
11	1.13501	1.66667	1.8	3.14286
12	1.23357	3.1	4.66667	3.5625
13	1.25629	1.55556	2.33333	1.25
14	1.15033	1.52381	1.33333	1.5
15	1.16274	2.25	1.85714	0.909091
16	1.24588	5	2.75	1.125
17	1.04219	2.6	2.75	2.1
18	1.0746	1.85714	1.375	2.375
19	1.21085	1.53333	3.42857	1
20	1.54131	1.625	1.7	1.11111
21	1.31721	1.85714	5.8	1.14286
22	1.19698	3	1.22222	1.375
23	1.01048	3.8	1.11111	1.42857
24		1.61905	1.42857	1.25
25		1.5	1.42857	1
26		1.72727	1.14286	7.5
27		2.88235	1.4	1.2
28		6.30769	1	2.11111
29		2.5	1.11111	1.22222
30		5.75	1.71429	1.11111
31		1.7	1.16667	1.375
32		4.58333	1.14286	1.1
33		2.65	1.4	2
34		3.72222	1.5	1.2
35		3.22222	1.625	1.5
36		2.5625	1.5	1.25
37		2.09091	1.6	1.75
38		4.375	1.16667	1.11111
39		4.66667	1.4	4
40		4.61538	1	1.27273
41		2.73684	1.33333	1.1
42		5.23529	1.28571	1.6
43		2.63158	1.28571	1.42857
44		2.21053	1	1.75
45		2	1.1	1.33333
46		2	1.28571	1.33333
47		1.22222	1.16667	2.57143
48		2.94444	1	1.11111
49		1.6		1.375
50		4.6		1.42857
51		2.66667		1.33333
52		4.75		1.15385
53		8.33333		1.375
54		2.5
55		4.54545
56		5.47059
57		2.13333
58		4.82609
59		5.08333
60		4.23529
61		3.88889
62		1.81818
63		2.05882
64		5.65217
65		4.72727
66		3.92857
67		2.95
68		8.0625
69		8.66667
70		5.16667
71		11.3333
72		6.4
73		2.06667
74		9.66667
75		2.25
76		2.5
77		1.54545
78		2.1875
79		2.85714
80		3.5
81		3.33333
82		2.45455
83		3.45455
84		4.53846
85		2.90909
86		2.83333
87		2.85714
88		3
89		2.1
90		2.89474
91		2.72727
92		1.76923
93		2.33333
94		2.14286
95		4.5
96		1.95455
97		1.71429
98		2.61538
99		2.77778
100		4.875
101		1.4
102		3.2
103		2.07692
104		2.47059
105		2
106		2.08696
107		3.7
108		5.5
109		3.57143
110		9
111		3.78571
112		1.92857
113		5.28571
Mean	3.74	1.673	1.938	1.207
SEM	0.2504	0.1371	0.1794	0.02509

## Sheet: 1M
	Fold change of aggregate length
Aggregate	Control	Mitomycin C	Aphidicolin
1	2.08777	1.23777	1.1525
2	3.56176	0.759929	1.64716
3	2.91211	1.07933	2.05603
4	2.17503	0.799082	2.05603
5	2.58534	0.910129	1.09027
6	2.47347	0.40289	1.46276
7	6.53868	1.50932	1.11869
8	2.67358	1.90933	0.867554
9	2.71486	1.73199	0.701889
10	2.2228	1.57786	0.403816
11	4.75546	1.29641	1.91043
12	3.47785	1.48574	1.01964
13	2.35013	1.19257	0.865186
14	2.08022	0.80336	1.08372
15	2.85665	1.53919	0.756336
16	1.74263	1.16985	1.16512
17	3.01717	1.38784	0.381291
18	2.13814	1.40147
19	1.73725	0.841367
20	1.33467	0.502457
Mean	2.772	1.177	1.161
SEM	0.2608	0.09118	0.1251

## Sheet: S2A
	Ki67 positive cell (%)
Aggregate	Non-elongating area	Elongating area
1	77.7778	100
2	35.2941	65.3846
3	66.6667	68.1818
4	40	87.8788
5	10.5263	55.5556
6	23.5294	40
7	13.7931	22.2222
8	30	72.7273
9	20.6897	43.75
10	36.3636	62.963
11	27.2727	29.4118
12	21.0526	22.2222
13	28.5714	60
14	20	40.9091
15	9.09091	19.0476
16	14.8148	38.2979
17	20	26.6667
18	28.5714	31.5789
Mean	29.11	49.27
SEM	4.244	5.565

## Sheet: S2B
	Anlge difference (°)
Cell division	Non-elongating area	Elongating area
1	37.252	14.243
2	53.054	8.591
3	46.714	0.776
4	32.678	7.259
5	16.969	0.883
6	15.75	9.372
7	3.05	1.442
8	7.425	3.423
9	1.714	4.428
10	43.286	53.73
11	33.278	67.594
12	42.9	3.126
13	30.291	1.649
14	21.697	0.039
15	46.714	1.248
16	13.541	6.882
17	53.294	10.644
18	38.887	6.882
19	67.73	6.593
20	12.322
21	46.714
22	30.291
23	17.893
24	6.882
25	40.572
26	33.447
27	43.752
28	11.281
29	47.694
30	15.012
Mean	30.4	10.99
SEM	3.174	4.146

## Sheet: S3B
	Average speed (μm/min)
	Rounded			Elongated
Aggregate	Control	Mitomycin C	Aphidicolin	Control	Mitomycin C	Aphidicolin
1	0.0613883	0.0869948	0.0997025	0.158104	0.165887	0.113997
2	0.0948774	0.130246	0.0877023	0.160935	0.127231	0.169424
3	0.136629	0.167901	0.135447	0.116658	0.161818	0.266785
4	0.117245	0.0583082	0.0846608	0.155097	0.133918	0.138266
5	0.105245	0.103208	0.0749033	0.199092	0.166625	0.133017
6	0.136124	0.0950277	0.101878	0.170584	0.145775	0.17158
7	0.105453	0.0824109	0.0861532	0.161235	0.207324	0.126915
8	0.0944914	0.143436	0.0916183	0.111236	0.113767	0.195189
9	0.0849238	0.106341	0.156612	0.132455	0.131441	0.131652
10	0.141241	0.102659	0.0888437	0.199057	0.144764	0.254383
11	0.111177	0.0691467	0.163309	0.22653	0.154264	0.134233
12	0.0764213	0.071403	0.09882	0.232456	0.11504	0.176193
13	0.229653	0.0766784	0.24132	0.177871	0.142978	0.162105
14	0.110855	0.100405	0.166546	0.140671	0.141273	0.179489
15	0.190668	0.106124	0.165766	0.123314	0.118973	0.119365
16	0.350646	0.175944	0.168644		0.153524	0.240913
17	0.170436	0.17861	0.162539		0.144903	0.243442
18	0.30238	0.168011	0.137625		0.17341
19	0.2091	0.121675	0.136697		0.14466
20	0.120756	0.1485	0.169313
21	0.140838	0.166746
22	0.168471
23	0.196516
24	0.192059
25	0.214446
Mean	0.1545	0.1171	0.1309	0.1644	0.1467	0.1739
SEM	0.01393	0.008416	0.009691	0.009671	0.005179	0.01215

[truncated: 5 more sheets: S3C, S3D, S3E, S3F, S3G]
