# Supplementary material for: Collagen polarization promotes epithelial elongation by stimulating locoregional cell proliferation
Source: eLife. 2021 Oct 18;10:e67915. doi: 10.7554/eLife.67915 (PMC8550756; doi:10.7554/eLife.67915)
Supplement: Figure 2—source data 1. [file elife-67915-fig2-data1.xlsx]

## Sheet: 2C
Aggregate	Symmetry ratio	Gel coherency (%)
1	1.26503	0.6
2	1.00102	0.375
3	1.24073	1.025
4	1.05279	2.675
5	5.38446	10.7
6	1.05721	0.6
7	1.20491	0.525
8	3.22103	3.3
9	1.27467	0.9
10	1.15856	0.6
11	1.05453	0.75
12	1.491	1.8
13	1.09743	1.55
14	1.22963	1.075
15	1.29827	0.65
16	7.81954	10.7
17	2.66536	5.875
18	1.31176	0.95
19	1.16366	4.025
20	2.28939	9
21	2.31243	1.625
22	2.88055	13.975
23	1.4869	1.2
24	1.56705	3.475
25	3.24345	10.375
26	1.47332	2.975
27	1.418	0.95
28	1.21316	9
29	1.26755	5.1
30	1.99506	7.625
31	2.03253	7.85
32	1.05241	2.05
33	2.20559	6.125
34	1.81407	2.75
35	1.77422	6.625
36	3.42727	9.4
37	3.67809	5.93333
38	1.00498	3
39	1.75677	7.95
40	1.39614	6.825
41	1.37517	3.975
42	3.03835	10.35
43	2.1107	9.4
44	3.50048	18.375
45	1.50339	4.65
46	1.76922	12.3
47	1.15099	0.825
48	3.07044	7.6
49	0.979592	4.925
50	2.44325	11.4
51	1.09407	3.125
52	2.85879	9.375
53	1.07303	3.725
54	2.14349	6.3
55	1.49231	0.95
56	1.81754	7.2
57	1.59069	4.1
58	4.95533	17.025
59	3.40633	16.5
60	2.06641	11.175
61	1.52133	6.95
62	3.81305	11.9
63	2.39784	18.9
64	4.57276	16.875
65	3.30129	11.475
66	6.14093	14.725
67	1.74415	4.275
68	2.48089	5.775
69	3.29738	9.775
70	3.40737	5.9
71	1.42008	3.775
72	1.57516	6.2
73	2.39528	9.225
74	3.54051	6.6
75	1.45939	3.15

## Sheet: 2D
	Fold differenfe of gel foherency (elongating area / non-elongating area)
Aggregat	Control	Rounded aggregate	Control	Elongated aggregate
1	1	2.6	1	2.38349
2	1	1.06298	1	3.21951
3	1	3.72727	1	2.75
4	1	1.875	1	5.75
5	1	0.222222	1	2.8
6	1	1	1	3.84536
7	1	1	1	4.20779
8	1	2	1	8.9
9	1	0.833333	1	8.26316
10	1	0.166667	1	3.14286
11	1	0.428571	1	4.20896
12	1	2.26471	1	2.70833
13	1	1.16667	1	3.56436
14	1	0.962963	1	5.66667
15	1	1.04478	1	5.65672
16	1	1	1	1.77778
17	1	1.125	1	4.28571
18	1	0.234043	1	2.60194
19	1	2.58333	1	2.45045
20			1	4.55263
21			1	2.07767
22			1	12.3208
23			1	12.3
24			1	3.17925
25			1	5.3125
26			1	2.78049
27			1	1.58621
28			1	13.6667
29			1	3.76471
30			1	4.37931
31			1	6.57143
32			1	2.67778
33			1	2.80851
Mean	1	4.732	1	1.331
SEM	0	0.5389	0	0.2168

## Sheet: 2E
	Fold differenfe of gel foherency (elongating area / non-elongating area)
Aggregate	Control	Rounded	Control	<2	Control	2-3	Control	3<
1	1	1.06522	1	1.23684	1	2.2029	1	2.78125
2	1	1.025	1	1.3125	1	0.9	1	1.61224
3	1	0.851064	1	0.972973	1	4.3	1	2.33333
4	1	0.840909	1	1.22605	1	1.78125	1	1.64557
5	1	1.175	1	1.31579	1	1.80769	1	3.52941
6	1	1.04651	1	1.64706	1	1.17949	1	3.23077
7	1	0.923077	1	1.72	1	2.87879	1	3.69231
8	1	1.55556	1	1.97778	1	1.85714	1	1.59245
9	1	1.4	1	2.12766	1	3.22222	1	1.53214
10	1	1.02703	1	2.15385	1	3.21569	1	1.33333
11	1	0.888889	1	1.13793	1	4.3	1	4.75862
12	1	1.16667	1	1.8	1	3.23077	1	2.19753
13	1	1.08571	1	1.5	1	2	1	3.52041
14	1	1.37931	1	1.75	1	2.47368	1	1.90805
15	1	1.0303	1	3	1	2	1	1.73333
16	1	0.848485	1	2.35294	1	4.4625	1	3.88372
17	1	0.464286	1	2.07692	1	3.86667	1	3.375
18	1	0.615385	1	3.26667	1	2.62222	1	1.94737
19	1	0.470588			1	2.95	1	2.45098
20	1	1			1	2.3125	1	3.97163
21	1	0.892857			1	1.52113	1	5.69444
22	1	0.574468			1	1.35	1	2.62921
23	1	1.35714			1	1.70968	1	5.03226
24							1	1.90196
25							1	3.14943
26							1	5.875
27							1	5.27273
28							1	3.75
29							1	4.55932
30							1	4.31034
31							1	6.45455
32							1	3.39286
33							1	4.16
34							1	1.68182
Mean	1	0.9862	1	1.81	1	2.528	1	3.262
SEM	0	0.05975	0	0.1469	0	0.2148	0	0.2422

## Sheet: 2G
	Gel coherency (%)
Aggregate	Control	Mitomycin C	Aphidicolin
1	5.4	1.475	0.675
2	4.9	2.125	0.666667
3	4.55	2	1.6
4	1	0.7	0.75
5	3	1.15	1.53333
6	3.43333	0.875	1.25
7	2.4	0.5	0.825
8	2.05	0.875	1.15
9	2.125	1.025	1.175
10	3.55	2.825	0.875
11	2.175	3.825	2.25
12	3.35	3.7	0.8
13	3.05	1.65
14	3	0.8
Mean	3.142	1.68	1.129
SEM	0.3215	0.2915	0.1373

## Sheet: 2I
	Symmetry ratio
Aggregates	Control	Blebbistatin	Y-27632
1	5.35714	1.03448	1.57143
2	7	1.28571	1.6
3	2.23077	1.25	1.17647
4	7.57143	1.125	1.16667
5	1.82609	1.16667	1.52941
6	2.16667	1.46667	1.65714
7	11.5	1.375	1.21053
8	1.77778	1.81818	1.5
9	3.0625	2.875	1.28571
10	5.10526	1.64706	1.92857
11	3.5	2	1.61538
12	2.5	1.35714	1.69231
13	3.63636	1.85714	1.30769
14	2.88235	1.17143	1.71429
15	7.26667	1.55556	1.66667
16	3	1.23077	1.46667
17	4.1875	1.6087	1.84615
18	5.10332	1.17391	1.53333
19	3.3821	1	2.11765
20	2.96545	1.31579	1.41667
21	1.67965	1.72414	2
22	2.06777	1.44138	1.85714
23		1.85548	1.51852
24		1.50894	1.45455
25		1.86583	1.36364
26		1.32854	1.07344
27		1.31694	1.73546
28		1.51153	1.33135
29		1.62524	1.63227
30			1.42614
31			1.557
32			1.2796
33			1.44781
34			1.05386
35			2.43459
36			1.87666
37			2.49106
Mean	4.08	1.5	1.582
SEM	0.5209	0.07004	0.05432

## Sheet: 2J
	Elongated aggregate			Rounded aggregte
Angle	Mean (%)	SEM	N	Mean (%)	SEM	N
-90	0	0	22	0	0	13
-85	0	0	22	0	0	13
-80	0.0218182	0.0119819	22	0	0	13
-75	0.0945455	0.0271657	22	0.0861538	0.0344469	13
-70	0.269091	0.0560879	22	0.406154	0.121008	13
-65	0.458182	0.0989198	22	0.984615	0.134167	13
-60	0.690909	0.0824802	22	1.51385	0.178072	13
-55	1.12727	0.144141	22	2.53538	0.256746	13
-50	1.40364	0.149965	22	3.11385	0.335822	13
-45	2.24	0.237272	22	3.68	0.430241	13
-40	3.00364	0.253733	22	4.40615	0.36621	13
-35	3.38182	0.31163	22	4.17231	0.240657	13
-30	4.15273	0.273602	22	3.96308	0.245178	13
-25	4.74909	0.334956	22	4.41846	0.233089	13
-20	5.16364	0.272934	22	4.36923	0.286093	13
-15	5.88364	0.259135	22	4.33231	0.252633	13
-10	6.29818	0.423915	22	4.34462	0.26306	13
-5	6.87273	0.4113	22	4.14769	0.356144	13
0	7.38182	0.420996	22	4.59077	0.316589	13
5	7.23636	0.466052	22	4.59077	0.333748	13
10	6.88727	0.484307	22	4.22154	0.397959	13
15	6.30545	0.463994	22	4.55385	0.33631	13
20	5.24364	0.427739	22	4.40615	0.26725	13
25	4.69818	0.244528	22	4.84923	0.309778	13
30	3.83273	0.288968	22	4.64	0.226998	13
35	3.17091	0.255843	22	4.16	0.182068	13
40	2.58182	0.239201	22	4.55385	0.108116	13
45	2.00727	0.179805	22	3.69231	0.261569	13
50	1.62909	0.156015	22	3.72923	0.327294	13
55	1.21455	0.131341	22	2.27692	0.187533	13
60	0.814545	0.139226	22	1.73538	0.246308	13
65	0.669091	0.113692	22	0.849231	0.139608	13
70	0.341818	0.0796845	22	0.443077	0.0961261	13
75	0.138182	0.0337782	22	0.135385	0.0398815	13
80	0.0290909	0.0170929	22	0.0861538	0.0292982	13
85	0.00727273	0.00727273	22	0.0123077	0.0123077	13
90	0	0	22	0	0	13

## Sheet: 2K
	Angle difference (°)
Aggregate	Elongating area	Non-elongating area
1	1.936	45.932
2	28.513	28.513
3	22.703	53.517
4	1.906	7.266
5	3.819	64.721
6	19.779	49.893
7	6.456	4.553
8	0	62.981
9	5.105	87.606
10	19.475	69.95
11	6.413	42.737
12	5.501	21.364
13	16.187	76.134
14	7.881	5.823
15	3.76	13.399
16	2.727	53.516
17	2.191	65.475
18	0.387	30.396
19	4.66	32.52
20	5.176	17.607
21	9.763	49.205
22	11.004	26.659
23	18.87	28.247
24	9.694	65.254
25	10.943	59.576
26	2.613	40.521
27	9.312	22.416
28	9.023	13.414
29	37.25	29.127
30	10.961	78.914
31	0.782	49.121
32	8.88	60.079
33	0.378	72.052
34	4.438	37.045
35	1.195	52.993
36	12.44	18.559
37	2.769	41.297
38	0.273	65.679
39	0.907	23.085
40	19.362	66.622
41	5.374	52.644
42	0.281	15.325
43	14.612	66.31
44	8.328	55.053
45	5.023	50.673
46	18.609	39.192
47	10.803	18.193
48	15.114	69.606
49	17.05	47.6
50	8.568	64.288
51	2.803	56.41
52	12.992	4.37
53	4.499	38.653
54	0.165	9.707
55	7.602	76.978
56	12.204	68.504
57	19.186	26.095
58	1.574	19.689
Mean	8.724	43.33
SEM	1.006	2.93

## Sheet: S2B
	Gel coherency (%)
	Rounded		Elongated
Aggregate	Control	NSC23766	Control	NSC23766
1	0.966667	1.6	1.25	2.75
2	0.766667	1.4	1.475	3.575
3	1.5	1.15	1.8	2.1
4	1.1	1.2	1.63333	2.43333
5	1.5	2.15	1.75	4.66667
6	0.875	1.3	2.45	4.975
7	2.1	2.23333	1.36667	10.5
8	1.9	1.75	2.15	9.55
9	1.06667	1.775	2.73333	4.3
10	1.36667	1.1	3.6	11.9333
11	1.8	0.9	1.2	7.7
12	1.83333		2.275	4.13333
13	2.15		1.675	3.2
14			2.45	6.85
15			2.4	11.95
16			1.95	3.66667
17			3.025	2.73333
18			4.53333	3.8
19			2.86667	3.2
20			5.83333
21			5.73333
22			3.95
23			4.46667
24			6.3
25			9.35
26			7.5
27			10.875
28			12.6
29			8.35
30			12.625
31			4.63333
32			11.55
33			11.55
Mean	1.456	1.505	4.785	5.475
SEM	0.1315	0.1311	0.6405	0.7493

## Sheet: S2C
	Nuclear motility (average speed um/min)
	Rounded		Elongated
Aggregate	Control	NSC23766	Control	NSC23766
1	0.0613883	0.12833	0.158104	0.242256
2	0.0948774	0.135409	0.160935	0.25286
3	0.136629	0.0709982	0.116658	0.183442
4	0.117245	0.126298	0.155097	0.177199
5	0.105245	0.146502	0.199092	0.176595
6	0.136124	0.132249	0.170584	0.145029
7	0.105453	0.123578	0.161235	0.267496
8	0.0944914	0.0777574	0.111236	0.150067
9	0.0849238	0.147299	0.132455	0.154794
10	0.141241	0.0807805	0.199057	0.13349
11	0.111177	0.0869229	0.22653	0.150327
12	0.0764213	0.178323	0.232456	0.162701
13	0.229653	0.180653	0.177871	0.126176
14	0.110855	0.180653	0.140671	0.141823
15	0.190668	0.148217	0.123314	0.251304
16	0.350646	0.138477	0.241995	0.251968
17	0.170436	0.135392	0.277038	0.167072
18	0.30238	0.116943	0.310479	0.200615
19	0.2091	0.168016	0.170191	0.224636
20	0.120756		0.279868	0.146309
21			0.199105
22			0.157593
23			0.171943
Mean	0.1475	0.1317	0.1858	0.1853
SEM	0.01688	0.007763	0.01123	0.01035

## Sheet: S2D
	Fold change
Aggregate	Control	NSC23766
1	2.08777	4.29246
2	3.56176	1.82934
3	2.91211	3.03367
4	2.17503	2.20017
5	2.58534	1.81128
6	2.47347	3.61358
7	6.53868	2.23669
8	2.67358	1.92296
9	2.71486	2.03656
10	2.2228	1.45129
11	4.75546	2.20519
12	3.47785	2.37921
13	2.35013	2.11696
14	2.08022	2.28068
15	2.85665	1.99226
16	1.74263	5.1314
17	3.01717	3.21778
18	2.13814	4.42598
19	1.73725	0.878226
20	1.33467	0.635715
Mean	2.772	2.485
SEM	0.2608	0.2579
