# Supplementary material for: Collagen polarization promotes epithelial elongation by stimulating locoregional cell proliferation
Source: eLife. 2021 Oct 18;10:e67915. doi: 10.7554/eLife.67915 (PMC8550756; doi:10.7554/eLife.67915)
Supplement: Figure 3—source data 1. [file elife-67915-fig3-data1.xlsx]

## Sheet: 3B
	Gel coherency
Position	- Stretch	+ Stretch
1	14.8	23.6
2	14.3	29
3	13.9	27.6
4	18.6	28.5
5	23.3	21.3
6	9	9
7	21.5	32.6
8	10.1	34.5
9	11.6	26.6
10	11	37.1
11	19.2	35
12		37.9
13		22.1
Mean	28.06	15.21
SEM	2.202	1.448

## Sheet: 3C
	- Stretch			+ Stretch
Angle	Mean (%)	SEM	N	Mean (%)	SEM	N
-90	0.295455	0.060813	3	0.134615	0.0739946	3
-85	0.386364	0.102664	3	0.307692	0.0780707	3
-80	0.409091	0.0748931	3	0.25	0.122811	3
-75	0.818182	0.15544	3	0.307692	0.15844	3
-70	0.909091	0.178684	3	0.461538	0.278537	3
-65	0.931818	0.140222	3	0.403846	0.282221	3
-60	0.818182	0.31881	3	0.461538	0.254708	3
-55	1.65909	0.124877	3	0.480769	0.472268	3
-50	1.72727	0.18023	3	0.653846	0.387965	3
-45	2.86364	0.218137	3	0.576923	0.718556	3
-40	3.75	0.313448	3	1.11538	1.05637	3
-35	4.20455	0.315017	3	1.53846	1.30463	3
-30	5.15909	0.302745	3	2.07692	1.07146	3
-25	5.20455	0.469745	3	2.92308	1.03617	3
-20	5.52273	0.536455	3	4.19231	0.679618	3
-15	6.5	0.537946	3	6.30769	0.551856	3
-10	6.84091	0.878603	3	9.42308	0.441167	3
-5	6.77273	1.10962	3	12.6346	0.870902	3
0	6.70455	1.11176	3	13.9038	0.802566	3
5	6.27273	0.781591	3	11.1731	0.901044	3
10	5.75	0.66719	3	10.0962	0.978752	3
15	5.11364	0.63926	3	6.5	0.818371	3
20	4.04545	0.411032	3	4.03846	0.631393	3
25	3.75	0.312463	3	2.46154	0.76277	3
30	3.02273	0.281103	3	1.88462	0.536672	3
35	1.97727	0.288462	3	1.28846	0.357476	3
40	1.65909	0.137111	3	0.769231	0.353991	3
45	1.5	0.163556	3	0.576923	0.310791	3
50	1.06818	0.16299	3	0.557692	0.261314	3
55	0.840909	0.134615	3	0.384615	0.15178	3
60	0.681818	0.151016	3	0.519231	0.187964	3
65	0.568182	0.111029	3	0.326923	0.151098	3
70	0.659091	0.115385	3	0.384615	0.16608	3
75	0.5	0.184789	3	0.384615	0.116775	3
80	0.5	0.0945377	3	0.192308	0.126131	3
85	0.409091	0.0958328	3	0.230769	0.122811	3
90	0.204545	0.0333087	3	0.0769231	0.100103	3

## Sheet: 3E
	Gel coherency (%)
Position	- Stretch	+ Stretch
1	8.8	9.9
2	6.6	15.3
3	6	6
4	7	8.6
5	14.5	0.6
6	10.6	2.2
7	6.9	4.5
8	18.5	9.7
9	14.8	6.8
10	13.1	21.2
11	14.1	30.3
12	11.2	22.5
13	15.6	7.1
14	20.9	12
15	15.5	11.7
16	8.1	14.6
17	17.7	23.6
18	21.2	9.2
19	9.8	21.1
20	14.1	6.8
21	10.4	7.5
22	12.4	21.8
23	5.5	16.7
24	9.4	2.9
25	5.4	5.1
26	4.9	14.8
27	14.3	17.6
28	10.1	16.7
29	13.9	10.3
30	8.9	13.3
31	4.1	12.6
32	2.7	7.7
33	1.9	8.4
34	0.9	3.2
35	5.7	4.6
36	6.8	4.6
37	9.2	0.6
38	7.7	2.3
39	4.3	8.5
40	1	7
41		9.8
Mean	9.863	10.72
SEM	0.828	1.089

## Sheet: 3F
	- Stretch			+ Stretch
Angle	Mean (%)	SEM	N	Mean (%)	SEM	N
-90	0.453539	0.118082	4	0.531592	0.154117	4
-85	0.931123	0.26495	4	1.17278	0.308204	4
-80	0.997755	0.236824	4	1.21534	0.299424	4
-75	1.1048	0.316519	4	1.27914	0.329806	4
-70	1.2463	0.343532	4	1.43475	0.342242	4
-65	1.49305	0.379168	4	1.64417	0.367463	4
-60	1.86432	0.418838	4	1.94661	0.303733	4
-55	2.31455	0.531638	4	2.37486	0.320747	4
-50	2.91938	0.58275	4	2.76915	0.32168	4
-45	3.52844	0.635965	4	3.25299	0.437745	4
-40	3.93413	0.576935	4	3.58923	0.484456	4
-35	4.19644	0.41022	4	3.75379	0.46757	4
-30	4.30236	0.474345	4	3.84789	0.352576	4
-25	4.34857	0.712592	4	3.9735	0.337768	4
-20	4.32834	0.789991	4	3.96677	0.528846	4
-15	4.23889	0.940469	4	4.09501	0.706267	4
-10	4.1368	0.983095	4	4.19439	0.925726	4
-5	4.10253	1.0407	4	4.25866	1.01349	4
0	4.06621	1.10459	4	4.30593	1.05702	4
5	3.95129	1.02516	4	4.17757	0.870666	4
10	3.91383	0.865698	4	4.04562	0.658938	4
15	3.81267	0.779623	4	3.91145	0.39412	4
20	3.77296	0.612847	4	3.74051	0.155846	4
25	3.73054	0.397642	4	3.63424	0.176681	4
30	3.64103	0.333758	4	3.5527	0.426338	4
35	3.54408	0.43814	4	3.49255	0.569647	4
40	3.34386	0.65793	4	3.21466	0.665132	4
45	3.07826	0.731848	4	2.96775	0.663999	4
50	2.65402	0.700563	4	2.56251	0.498231	4
55	2.15005	0.609901	4	2.17706	0.362518	4
60	1.74033	0.47564	4	1.8008	0.291505	4
65	1.46704	0.382162	4	1.59327	0.243511	4
70	1.25116	0.377442	4	1.39979	0.261097	4
75	1.09158	0.305939	4	1.26822	0.268142	4
80	0.977345	0.269555	4	1.17534	0.297301	4
85	0.917478	0.269001	4	1.13713	0.299163	4
90	0.454942	0.129836	4	0.54228	0.156501	4

## Sheet: 3H
	Initiation time (h)
Aggregate	- Stretch	+ Stretch
1	23	31
2	62	39
3	83	59
4	85	85
5	78	97
6	74	102
7	79	25
8	79	32
9	40	83
10	48	11
11	25	17
12	61	25
13	107	115
14	21	9
15	21	22
16	35	64
17	60	67
18	69	36
19	94	13
20	106	15
21	98	28
22	97	34
23	106	33
24	48	52
25	111	39
26		16
27		18
28		64
29		16
30		17
31		26
32		27
33		23
34		7
35		8
36		21
37		8
38		26
39		46
40		83
41		12
42		20
43		77
44		18
45		29
46		20
47		45
48		66
49		67
50		88
51		92
52		6
53		7
54		7
55		6
56		28
57		42
58		23
59		18
60		24
61		26
62		28
63		69
64		19
65		21
66		8
67		10
68		16
69		19
70		22
71		23
Mean	68.4	35.14
SEM	5.871	3.227

## Sheet: 3I
	Symmetry ratio
	day 0		day 1		day 2		day3
Aggregate	- Stretch	+ Stretch	- Stretch	+ Stretch	- Stretch	+ Stretch	- Stretch	+ Stretch
1	1.18018	1.38476	1.03337	2.41385	1.48834	1.40201	1.03719	4.15302
2	1.00117	1.10198	3.15142	3.20924	1.23321	8.82264	1.34502	6.24159
3	1.05578	1.08554	1.04445	2.67261	1.13889	19.6204	1.26639	3.4042
4	1.01224	1.33394	1.29324	3.36589	1.18326	6.52724	1.87253	7.84838
5	1.04432	1.30884	1.31131	3.04371	1.42574	1.38547	1.18886	1.83169
6	1.1022	1.22237	1.44148	4.68393	1.27867	5.45217	1.45956	5.7246
7	1.32435	1.25921	1.94165	2.56051	1.24862	2.27047	2.08135	2.27899
8	1.13394	1.34222	1.08322	2.78144	1.19439	3.19921	1.14097	3.03221
9	1.30855	1.20863	1.14774	1.31131	1.34914	6.61121	1.40509	8.12871
10	1.16935	1.09764	1.19233	1.44148	1.52936	11.4478	1.62623	6.81502
11	1.05656	1.09791	1.00905	1.94165	1.43972	4.18444	2.24286	4.6942
12	1.50317	1.042	1.15466	1.42174	1.59148	5.47025	1.29988	8.17365
13		1.20641		1.08322	1.31122	5.44675	1.25448	6.5584
14		1.56182		1.53211	1.50987	4.63553	1.66931	11.0481
15		1.17362		1.38439	1.15008	5.45666	1.87518	6.58714
16		1.03702		1.01396	1.52963	6.52256	1.84752	5.16388
17		1.18854		1.27858	1.04755	2.32092	1.65393	8.88745
18		1.19162		1.14774	1.1488	2.12032	1.49346	12.0918
19		1.03261		1.19233	1.16477		1.54501	10.3276
20		1.20242		1.00905	1.48599		1.44139	5.20204
21		1.30143		3.57713	1.20815		1.35041	4.4753
22				3.69871	1.87894		1.27251	9.44955
23				1.6236	1.24824		7.86457
24				1.15466	1.0054		2.69967
25				1.13764
26				5.6198
27				1.28304
28				4.36854
29				13.5991
30				8.32012
31				8.31539
32				6.506
Mean	1.158	1.209	1.4	3.115	1.325	5.716	1.831	6.46
SEM	0.04381	0.02895	0.1754	0.4925	0.04141	1.025	0.2738	0.6005

## Sheet: 3J
	Elongation angle				Number of aggregate
Aggregate	- Stretch	+ Stetch		Angle	- Stretch	+ Stetch
1	28.909	72.824		0	1	7
2	74.399	33.711		5	7	23
3	77.093	18.869		10	4	12
4	5.711	30.964		15	3	16
5	57.672	9.982		20	7	19
6	47.231	12.529		25	5	5
7	83.24	3.137		30	5	6
8	24.336	1.935		35	6	7
9	75.016	70.084		40	3	0
10	63.435	80.407		45	10	2
11	19.708	2.147		50	10	2
12	39.928	1.736		55	11	0
13	50.744	60		60	6	2
14	6.34	77.471		65	7	3
15	57.529	66.602		70	6	3
16	70.253	21.038		75	8	4
17	58.878	13.627		80	6	4
18	71.075	33.111		85	5	0
19	87.852	13.449		90	2	0
20	79.249	25.084		N	112	115
21	46.668	5.194
22	20.323	13.655
23	14.323	1.685
24	73.301	28.217
25	47.936	16.783
26	36.304	3.691
27	44.409	34.509
28	65.078	4.927
29	46.432	15.573
30	54.09	15.781
31	77.905	77.943
32	25.201	61.232
33	43.877	72.255
34	49.485	74.511
35	55.784	18.898
36	6.633	27.951
37	21.105	3.814
38	77.005	6.096
39	66.038	70.942
40	6.367	10.125
41	11.611	19.134
42	26.887	31.608
43	6.789	5.826
44	33.69	30.619
45	85.721	12.665
46	56.31	2.663
47	69.978	9.462
48	56.837	14.23
49	58.643	17.896
50	11.047	16.928
51	59.972	12.011
52	45	17.784
53	44.37	4.351
54	41.906	5.711
55	50.793	31.139
56	85.84	4.548
57	90	5.389
58	55.814	19.537
59	44.061	35.074
60	82.333	36.661
61	79.461	3.991
62	78.69	16.422
63	34.261	7.352
64	24.146	2.121
65	51.132	2.598
66	77.005	1.736
67	82.504	5.315
68	66.161	10.389
69	5.572	18.617
70	21.251	5.332
71	58.889	7.595
72	80.34	5.343
73	51.876	7.214
74	53.13	22.068
75	39.56	16.858
76	63.97	15.124
77	83.48	80.311
78	22.38	20.283
79	52.595	22.38
80	2.647	20.925
81	15.55	17.488
82	28.666	25.436
83	26.878	14.226
84	18.276	23.356
85	2.095	17.162
86	63.435	9.09
87	51.843	7.927
88	67.521	47.513
89	36.229	44.694
90	54.728	11.216
91	69.127	64.583
92	14.824	2.231
93	71.565	8.417
94	31.931	9.147
95	12.423	5.194
96	30.23	73.915
97	35.803	65.462
98	75.561	43.484
99	31.651	20.999
100	76.285	4.664
101	66.14	33.599
102	55.055	19.421
103	43.409	24.068
104	43.141	37.108
105	50.332	21.125
106	56.03	24.864
107	52.299	19.14
108	52.431	10.561
109	55.222	51.442
110	18.199	19.872
111	8.183	19.179
112	34.548	22.011
113		6.096
114		3.834
115		80.587

## Sheet: 3K
	Angle difference (°)
Aggregate	- Stretch	+ Stretch
1	27.7473	0.982
2	33.016	21.567
3	27.658	24.2387
4	37.423	20.2542
5	78.243	4.18575
6	73.925	5.569
7	3.31
8	11.402	1.9515
9	11.716	16.0768
10	25.612	0.34075
11	32.9318	6.613
12	33.507	11.672
13	21.492	10.103
14	40.2345
15	28.697	31.3818
16	40.2155	16.4183
17	16.0455	13.2888
18	27.4977	13.866
19	78.4758	21.9262
20	6.438	14.051
21	54.201	13.5463
22
23		21.0472
24		12.2767
25		24.452
26		4.149
27		15.094
28		23.6383
29		10.676
30		12.9823
31		11.8023
32		0.855667
33		8.325
34		7.17125
35		0.61775
36		12.4035
37		6.02125
38		2.496
39		0.4155
40		10.7785
41		18.6182
42		0.026
43		15.406
44		7.79633
45		4.41425
46		16.2697
47		16.3107
48		0.535667
49		11.037
50		7.60475
51		5.31775
52		11.6183
53		9.271
54		5.35875
55		9.588
56		3.7165
57		4.147
58		9.2495
59		6.063
60		0.73075
61		12.8575
62		9.85775
63		3.11625
64		8.984
65		6.5935
66		5.03925
67		3.522
68		5.7435
69		0.186
70		7.6645
71		14.6387
72		11.9045
73		7.95325
74		4.2235
75		6.4755
76		11.8637
77		0.27175
78		4.68367
79		6.033
80		6.60975
81		10.6382
82		5.835
83		2.61675
84		0.35425
85		2.7085
86		0.43525
87		11.1913
88		13.4205
89		17.2258
90		7.32025
91		12.4288
92		1.5625
93		12.0073
94		1.2625
95		20.187
96		1.7625
97		14.914
98		23.7222
99		20.6415
100		14.2775
101		0.1715
Mean	33.8	9.482
SEM	4.74	0.7013

## Sheet: 3M
	Gel coherency (%)
Aggregate	- Stretch	+ Stretch
1	3.05	3.3
2	2.375	2.7
3	0.8	3.3
4	1.575	1.7
5	0.975	2.5
6	3.35	6.6
7	2.55	4.4
8	2.875	3.4
9	4.85	5.4
10	0.875	3.8
11	0.625	4.5
12	1.225	10.2
13	1.125	1.7
14	0.396203	1.4
15	2	3.5
16	3.875	7.6
17	2.375	8.8
18	1.06667	5.2
19	2.375	2.8
20	1.3	3.3
21	2.8	5
22		17.5
23		8.1
24		11.6
25		7.1
26		9.5
27		4.5
28		13.5
29		8.9
30		4.2
31		7.3
32		12.8
33		8.8
34		10.3
35		4
36		1.9
37		2.5
38		2.4
39		5.8
40		3.5
41		4
42		2.1
43		3.2
44		2.9
45		6
46		8
47		8.2
48		1.7
49		1.6
50		1.6
51		4.1
52		2.1
53		10.7
54		18.4
55		3.3
56		4.7
57		4
58		7.9
59		3
60		3.3
61		3
62		2.6
63		2.8
64		5.3
65		6.7
66		5.7
67		5.2
68		8.3
69		7.4
70		5.5
71		8.8
72		14.7
73		8
74		4.2
75		1.8
76		25.5
77		2.6
78		1.9
79		7.8
80		7.2
81		3.9
82		5.9
83		2.7
84		4.3
85		16.9
86		6.3
87		2.3
88		1.8
89		3.4
90		1.7
91		2.3
92		8.9
93		5.3
94		5.9
95		4.1
Mean	2.021	5.756
SEM	0.2573	0.43

## Sheet: S1D
	Gel coherency
Position	- Stretch	+ Stretch
1	9.5	19.9
2	18.65	16
3	31.075	5.7
4	10.3	12.3
5	14.125	10.8
6	6.3	16.7
7	7.3	17.5
8	3.6	29.1
9	6.2	10.9
10	3.6	31.5
11	7.6	19.8
12	12.2	17.8
13	14.7	17
14	11.3	9.5
15	11.5	14.1
16	29.7	7.9
17	11.5	17.9
18	14.1	17.7
19	12.3	11.5
20	6	22.9
21	12.5	24.5
22	20.7	16.3
23	10.2	29.5
24	13.4	21.7
25	9.5	25.4
26	10	27.8
27	11.5	21.9
28	10.6	10.5
29	15.6	25.2
Mean	12.26	18.25
SEM	1.183	1.277

[truncated: 3 more sheets: S1E, S2B, S2D]
