# Supplementary material for: Collagen polarization promotes epithelial elongation by stimulating locoregional cell proliferation
Source: eLife. 2021 Oct 18;10:e67915. doi: 10.7554/eLife.67915 (PMC8550756; doi:10.7554/eLife.67915)
Supplement: Figure 4—source data 1. [file elife-67915-fig4-data1.xlsx]

## Sheet: 4A
	Elongated aggregate (%)
Experiment	Re-embed	Float
1	56.701	24.0909
2	65.3846	21.988
3	51.9751	27.2189
Mean	58.02	24.43
SEM	3.927	1.52

## Sheet: 4B
	Length (um)
Experiment	Re-embed	Float
1	429.273	238.868
2	412.353	264.247
3	549.277	270
Mean	463.6	257.7
SEM	43.1	9.564

## Sheet: 4C
	Gel coherency (%)
Aggregate	Re-embed	Float
1	1.65	0.75
2	1.375	0.475
3	1.275	0.4
4	2.025	0.75
5	1.75	0.675
6	1	0.6
7	1.1	0.825
8	1.25	0.45
9	1.35	0.625
10	1.425	0.65
11	1.5	0.5
12	1.475	0.575
13	1.175	0.6
14	1.3	0.475
15	1	0.45
16	1	0.775
17	1	0.625
18	0.7	0.575
19	1.375	0.55
20	1.425	0.6
21	1.475	0.5
22	0.975	0.65
23	1.55	0.4
24	0.475	0.75
25	1.775	0.75
26	1.725	0.475
27	1.8	0.65
28	1.7	0.5
29	1.5	0.55
30	2.425	0.575
31	2.125	0.35
32		0.55
33		0.775
34		0.65
35		0.625
36		0.6
37		0.7
Mean	1.409	0.5939
SEM	0.07376	0.01941

## Sheet: 4E
	Initiation time (h)
	- Stretch	+ Stretch
Aggregate	Embed	Embed	Transfer
1	41	9	73
2	8	10	144
3	107	11	135
4	80	11	20
5	88	83	88
6	85	14	99
7	60	51	96
8	30	54	23
9	48	28	14
10	63	54	89
11	99	58	59
12	94	76	78
13	81	116
14	90	9
15	6	13
16	10	22
17	122	8
18	35	12
19	52	16
20	55	43
21	61	6
22	16	7
23	28	12
24	68	7
25	73	9
26	71	13
27	8	14
28	13	20
29	77	40
30	96	14
31		18
32		23
33		9
34		15
35		5
36		7
37		18
38		4
39		5
40		11
41		18
42		20
Mean	58.83	23.64	76.5
SEM	6.055	3.753	12.13
