# Supplementary material for: Collagen polarization promotes epithelial elongation by stimulating locoregional cell proliferation
Source: eLife. 2021 Oct 18;10:e67915. doi: 10.7554/eLife.67915 (PMC8550756; doi:10.7554/eLife.67915)
Supplement: Figure 5—source data 1. [file elife-67915-fig5-data1.xlsx]

## Sheet: 5A
	Ki67 positive cell (%)
	day 0		day 1		day 2		day 3		day 8
Aggregate	- Stretch	+ Stretch	- Stretch	+ Stretch	- Stretch	+ Stretch	- Stretch	+ Stretch	- Stretch	+ Stretch
1	0	1.28205	0	2.94118	0	25	1.53846	40.8537	13.8095	67.7419
2	0	0	0	4.16667	0	78.8618	7.14286	50.5495	35.1163	22.2222
3	10	0	0	4	6.89655	60	13.0435	43.3333	12.963	64.1791
4	0	0	0	3.1746	4.16667	61.0169	9.25926	48.2143	12.9825	50
5	0	0	0	1.72414	2.77778	55.3571	3.75		12.069	31.4815
6	0	0	0	0	8.33333	62.963	9.43396	23.7288	19.1837	51.3514
7	0	0	7.84314	5.26316	13.0435	54.1667	29.6296	66.6667	7.14286	52.7027
8	0	0	8	6.97674	0	50	25	62.069	5.11628	47.5728
9	2.5	0	4.16667	20.6897	12.5	30.4348	3.1746		12.5413	54.6218
10	0	0	5.26316	5.88235	0		11.1111	81.0345	30.5483	43.1818
11	0	0	0	7.40741	10	26.7857	5.33333	60.1227	0.97561	31.0627
12	0	0	0	9.7561	2.08333	29.5775	4.44444	36.0825	45.7143	32.0346
13		0		8.69565	6.06061	66.129	6.25	46.4646	34.7619	54.4643
14		3.22581		16.6667	4.7619	51.2195	15.3846	33.9623	25.7009	58.0645
15		0		0	1.85185	36.8421	12.2449	87.5	41.5385	47.619
16		0		0	3.44828	37.037	8.33333	54.1872	30.9249	46.3576
17		0		4.16667	0	78.125	6.52174	72.449	33.3333	20.7547
18		3.44828			0	9.43396	11.1111	87.5		29.1667
19		0		59.6774	7.69231	34.1463	6.49351	57.2581		44.4444
20		0		25	4.7619		8.88889	71.4286		14.1593
21		0		48.6486	5		3.84615	30.7292		49.4872
22				36.1702	21.7391		25	56.3758		38.9474
23				24.3243	6.45161		4.61538	47.2973		47.541
24				44.6809	0		14.876			48.9362
25				36			8.16327			20.8791
26										49.7608
27										31.8182
28										35.8491
29										31.8681
30										30.303
31										52
32										24.6575
Mean	1.042	0.3789	2.106	15.67	5.065	47.06	10.18	55.13	22.02	41.41
SEM	0.8404	0.2232	0.9429	3.553	1.087	4.562	1.435	3.93	3.292	2.379

## Sheet: 5B
	Length (um)
Aggregate	Control	Mitomycin C	Aphidicolin
1	280	400	220
2	240	100	120
3	740	150	110
4	650	210	90
5	360	270	310
6	410	170	170
7	270	90	180
8	310	100	90
9	360	120	300
10	690	130	230
11	1110	80	100
12	970	90	240
13	690	110	130
14	250	60	150
15	670	250	130
16	1100	100	280
17	640	520	100
18	360	340	100
19	410	140	230
20	960	70	110
21	460	50	160
22	270	200	240
23	230	250	90
24	170	110	90
25	400	310	130
26	400	130	150
27	510	340	150
28	350	130	250
29	220	190	70
30	450	130	70
31	350	150	80
32	200	170	100
33	640	170	40
34	380	110	80
35	370	80	100
36	650	120	90
37	390	210	210
38	150	100
39	200	100
40	510
41	190
42	910
43	440
44	480
45	220
46	220
47	330
48	760
49	440
Mean	464.5	167.9	148.4
SEM	35.37	16.3	11.76

## Sheet: 5C
	Symmetry ratio
Aggregate	Control	Mitomycin C	Aphidicolin
1	2.6	5	1
2	2.5	1.5	1.14286
3	4.6	2	1.5
4	4.33333	5.6	1.3
5	4.44444	5	1.14286
6	2.88889	1.5	4.5
7	2.21429	1.33333	3.2
8	6.16667	1.6	1.15385
9	6	2.28571	1.83333
10	6.8	1.4	1.8
11	1.46154	2	1.25
12	3.125	1.33333	2.77778
13	1.77778	1.66667	1.92308
14	13.8	3	1.66667
15	1.82353	1.33333	1
16	1.7	3.5	3
17	5.33333	1.75	4.6
18	10	1.5	1.5
19	5.8	1.16667	1.5
20	3.28571	1.33333	1.875
21	2.28571	4.4	1.44444
22	3.25	1	3.5
23	5.25	8.25	2.4
24	2.44444	1.57143	3.75
25	9.2	1.75	3.57143
26	3.875	5	1
27	2.28571	3.85714	1.28571
28	2	4.71429	1.8
29	11.1667		1
30	2.73333
31	1.66667
32	3.46154
33	4.8
34	1.38462
35	1.73333
36	4
37	2.33333
38	3.625
39	1.83333
40	6.6
41	9
42	9
43	4.09091
44	9
45	7.6
46	3.85714
47	2.22222
48	2.25
49	6
50	2.55263
51	5.625
52	4.14286
53	2.5
54	3
55	5.57143
56	6
57	4.375
58	2.83333
59	2.85714
60	5.71429
61	5.28571
62	9.16667
Mean	4.504	2.727	2.049
SEM	0.3426	0.3437	0.2015

## Sheet: 5E
	Ki67 positive cell (%)
Aggregate	Re-embed	Float
1	67.7419	2.24215
2	22.2222	5.66038
3	64.1791	20.5128
4	50	24.5283
5	31.4815	10.7143
6	51.3514	60.4167
7	52.7027	19.4444
8	47.5728	20.9091
9	54.6218	27.619
10	43.1818	6.19469
11	31.0627	36.5145
12	32.0346	33
13	54.4643	28.7709
14	14.1593	27.1186
15	49.4872	18.75
16	38.9474	27.3438
17	47.541	11.0638
18	48.9362	40.7407
19	20.8791	22.1591
20	49.7608	23.5294
21	31.8182	17.0213
22	35.8491	10.2564
23	31.8681	10
24	30.303	43.6364
25	52
26	24.6575
27	58.0645
28	47.619
29	46.3576
30	20.7547
31	29.1667
32	44.4444
Mean	41.41	22.84
SEM	2.379	2.769

## Sheet: 5F
	Ki67 positive cell (%)
Aggregate	Re-embed	Float
1	90.5882	2.24215
2	64.1791	5.66038
3	50	20.5128
4	31.4815	24.5283
5	51.3514	10.7143
6	52.7027	60.4167
7	47.5728	36.5145
8	54.6218	33
9	43.1818	27.1186
10	31.0627	27.3438
11	32.0346	31.3766
12	54.4643	40.7407
13	14.1593	22.1591
14	41.8079	23.5294
15	38.9474	17.0213
16	52.439	10.2564
17	20.8791	10
18	49.7608	43.6364
19	31.8182
20	35.8491
21	31.8681
22	30.303
23	52
24	58.0645
25	47.619
26	46.3576
27	20.7547
28	29.1667
29	44.4444
Mean	43.09	24.82
SEM	2.845	3.491
