# Supplementary material for: Collagen polarization promotes epithelial elongation by stimulating locoregional cell proliferation
Source: eLife. 2021 Oct 18;10:e67915. doi: 10.7554/eLife.67915 (PMC8550756; doi:10.7554/eLife.67915)
Supplement: Figure 6—source data 1. [file elife-67915-fig6-data1.xlsx]

## Sheet: 6B
	ERK active cells (%)
Aggregate	Non-elongating area	Elongating area
1	16.2162	63.6364
2	43.75	60.8696
3	19.0476	46.6667
4	11.1111	71.875
5	35.5556	67.8571
6	25	80
7	25	31.3253
8	41.9355	59.0909
9	33.3333	55.2632
10	31.5789	41.6667
11	32	54.3478
12	43.75	60.3774
13	46.0674	85.7143
14		39.1304
15		44.8276
16		89.1304
17		78.1818
Mean	31.1	60.59
SEM	3.13	4.071

## Sheet: 6C
	ERK active cells (%)
Aggregate	Non-elongating area	Elongating area
1	37.5	64.2857
2	57.1429	77.2727
3	33.3333	54.5455
4	31.5789	71.4286
5	31.25	93.3333
6	75	75
7	33.3333	22.5806
8	63.6364	46.6667
9	57.1429	47.8261
10	42.8571	75
11	50	53.5714
12	66.6667	84.6154
13	64.2857	75
14		54.5455
15		78.2609
16		90.3226
17		86.3636
Mean	49.52	67.68
SEM	4.271	4.542

## Sheet: 6E
	Ki67 positive cell (%)
Aggregate	Control (DMSO)	FR180204
1	67.8049	13.5593
2	58.7591	8.33333
3	67.7725	20
4	70.5426	5.26316
5	64.6018	9.67742
6	39.7959	40.4255
7	57.9832	8.51064
8	40.3846	45.3237
9	49.217	27.3585
10	45.7944	6.89655
11	44.2529	3.22581
12	39.2405	15.5039
13	46.0317	0.869565
14	46.888	10.5263
15	40.625	3.33333
16		0
17		0
18		0
19		4.25532
Mean	51.98	11.74
SEM	2.949	3.013

## Sheet: 6F
	Elongated aggregate (%)
	day 3		day 7
Experiment	Control (DMSO)	FR180204	Control (DMSO)	FR180204
1	46.6667	9.09091	47.7612	41.6667
2	47.619	7.5	85	43.4783
3	63.6364	17.3913	48.9362	45.3125
Mean	52.64	11.33	60.57	43.49
SEM	5.505	3.067	12.22	1.052

## Sheet: 6G
	Length (um)
Aggregate	Control (DMSO)	FR180204
1	460	370
2	290	610
3	680	360
4	270	210
5	470	550
6	300	280
7	1090	350
8	380	270
9	380	280
10	330	150
11	450	320
12	600	510
13	390	280
14	630	160
15	550	180
16	620	360
17	600	650
18	1660	320
19	730	250
20	550	160
21	300	570
22	240	350
23	1200	610
24	510	380
25	850	240
26	240	130
27	1240	810
28	1070	340
29	500	410
30	610	920
31	880	340
32	520	610
33	2540	550
34	770	760
35	650	470
36	250	190
37	620	470
38	380	400
39	320	510
40	1050	440
41	290	300
42	340	230
43	370	700
44	440	660
45	310	330
46	250	420
47	770	510
48	260	290
49	450	180
50	570	270
51	390	220
52	1190	530
53	810	290
54	760	560
55	370	230
56	340	310
57	270	260
58	600	650
59	1320	370
60	700	230
61	1600	1240
62	1180	530
63	1230	130
64	1080	140
65	1480	190
66	400	310
67	370	640
68	660	480
69	330	270
70	1220	250
71	460	280
72	1860	690
73		1050
74		400
75		610
76		390
77		520
78		590
79		370
80		370
81		660
82		910
83		310
84		270
85		310
86		330
87		340
88		270
89		370
90		190
91		370
92		270
93		820
94		800
Mean	678.3	418.4
SEM	52.35	22.19

## Sheet: 6H
	Symmetry ratio
Aggregate	Control (DMSO)	FR180204
1	2.875	4.625
2	2.07143	4.35714
3	4.85714	2.57143
4	1.8	1.75
5	2.61111	3.66667
6	3	2.33333
7	8.38462	3.5
8	2.11111	1.8
9	3.16667	2.54545
10	1.94118	1.875
11	5	2.46154
12	4.61538	4.63636
13	3.25	2.54545
14	4.84615	2.66667
15	3.4375	2
16	5.16667	3.6
17	5.45455	5.90909
18	15.0909	3.55556
19	12.1667	4.16667
20	3.92857	2.28571
21	3	4.75
22	3.42857	2.33333
23	8	5.08333
24	5.66667	5.42857
25	5.66667	3
26	2	1.44444
27	8.85714	4.76471
28	11.8889	2.125
29	2.63158	3.15385
30	6.77778	4.84211
31	6.28571	1.78947
32	3.25	4.69231
33	19.5385	5.5
34	7	6.33333
35	6.5	2.61111
36	4.16667	2.11111
37	12.4	3.61538
38	4.75	2.85714
39	8	3.64286
40	26.25	2.58824
41	4.83333	1.875
42	3.4	1.35294
43	7.4	4.375
44	7.33333	5.5
45	6.2	3.66667
46	3.57143	3.5
47	9.625	5.1
48	2.88889	1.8125
49	9	1.8
50	9.5	3
51	7.8	2.75
52	14.875	4.81818
53	11.5714	2.9
54	8.44444	4
55	6.16667	2.09091
56	11.3333	2.38462
57	3.375	2.36364
58	6	4.64286
59	10.1538	5.28571
60	14	2.55556
61	22.8571	4
62	14.75	2.52381
63	11.1818	1.625
64	10.8	1.4
65	16.4444	3.8
66	4	3.1
67	6.16667	5.33333
68	11	4.36364
69	3.66667	3.85714
70	12.2	2.08333
71	5.11111	1.86667
72	13.2857	5.75
73		9.54545
74		2.85714
75		2.90476
76		3.25
77		3.46667
78		4.21429
79		3.7
80		2.64286
81		4.71429
82		6.5
83		4.42857
84		3.85714
85		1.9375
86		2.2
87		2.61538
88		3.375
89		4.11111
90		2.11111
91		3.36364
92		1.6875
93		5.85714
94		11.4286
Mean	7.511	3.529
SEM	0.5895	0.1701
