# Supplementary material for: Collagen polarization promotes epithelial elongation by stimulating locoregional cell proliferation
Source: eLife. 2021 Oct 18;10:e67915. doi: 10.7554/eLife.67915 (PMC8550756; doi:10.7554/eLife.67915)
Supplement: Figure 7—source data 1. [file elife-67915-fig7-data1.xlsx]

## Sheet: 7D
	Ki67 positive cell (%)
Aggregate	Control (IgG)	AIIB2
1	73.1449	14.8148
2	57.2327	3.79747
3	67.9487	5.12821
4	66.3594	5.9322
5	53.876	6.55738
6	52.9954	9.09091
7	68.3962	25
8	69.3878	9.09091
9	78.8321	8.33333
10	36.8217	4.34783
11	52.5	5.09554
12	41.6107	3.0303
13	29.4118	2.38095
14	24.5098	2.27273
15	38.0117	0
16	28.3951	24.6377
17		8.77193
18		40.6417
19		21.3333
20		59.7403
21		9.44882
22		23.3766
23		28.2051
24		16.2162
25		12.1019
26		12.1212
27		20.4225
28		18.5714
29		8.57143
Mean	52.46	14.1
SEM	4.371	2.4

## Sheet: 7E
	Elongated aggregate (%)
	day 3		day 7
Experiment	Control (IgG)	AllB2	Control (IgG)	AllB2
1	48.7179	16.6667	43.9394	27.6786
2	46.6667	10.2564	76.9231	44.2857
3	52.1739	26.6667	57.1429	40.9639
Mean	49.19	17.86	59.34	37.64
SEM	1.607	4.775	9.584	5.074

## Sheet: 7F
	Length (um)
Aggregate	Control (IgG)	AllB2
1	2040	280
2	780	200
3	660	410
4	1140	520
5	820	220
6	940	330
7	480	650
8	980	350
9	1140	190
10	1270	130
11	1030	190
12	2710	280
13	610	610
14	660	470
15	460	400
16	770	250
17	1060	420
18	1380	230
19	800	190
20	390	350
21	300	310
22	360	330
23	650	670
24	490	300
25	1020	1090
26	750	200
27	770	360
28	550	310
29	1690	320
30	460	360
31	500	610
32	610	840
33	620	770
34	790	570
35	610	240
36	730	310
37	340	430
38	1100	1140
39	640	730
40	570	870
41	510	220
42	770	520
43	600	280
44	450	460
45	450	250
46	250	350
47	480	810
48	300	350
49	470	390
50	630	150
51	300	600
52	320	280
53	800	310
54	720	260
55	1080	390
56	330	290
57	1010	590
58	660	350
59	870	380
60	990	700
61	1920	670
62	750	180
63	450	310
64	420	240
65	860	180
66		580
67		370
68		710
69		210
70		550
71		890
72		350
73		410
74		700
75		370
76		1060
77		430
78		640
79		190
80		450
81		420
82		240
83		550
84		470
85		970
86		590
87		240
88		980
89		440
90		760
91		290
92		160
93		500
94		370
95		290
96		450
Mean	770.2	443.4
SEM	54.37	23.58

## Sheet: 7G
	Symmetry ratio
Aggregate	Control (IgG)	AllB2
1	6.18182	3.11111
2	13	2.22222
3	4.4	3.41667
4	8.14286	4
5	4.1	2
6	5.22222	4.71429
7	3.42857	4.33333
8	7	2.1875
9	8.14286	1.46154
10	10.5833	1.85714
11	4.68182	1.9
12	24.6364	1.75
13	8.71429	2.90476
14	9.42857	3.13333
15	4.18182	2.85714
16	7.7	1.66667
17	8.83333	2.8
18	15.3333	1.53333
19	5.33333	1.9
20	3.9	3.88889
21	5	2.38462
22	3.6	1.57143
23	8.125	4.1875
24	4.9	2.14286
25	6.8	6.41176
26	4.6875	2.5
27	5.5	2.57143
28	5.5	2.58333
29	12.0714	2.46154
30	7.66667	1.71429
31	6.25	3.58824
32	3.21053	6
33	4.76923	4.27778
34	7.9	3.5625
35	6.1	1.71429
36	6.08333	3.1
37	3.09091	3.58333
38	5.5	5.42857
39	4	4.86667
40	4.38462	7.25
41	3.1875	2.44444
42	5.5	4.72727
43	5.45455	2.54545
44	3	2.55556
45	2.25	2.77778
46	3.57143	2.69231
47	3.69231	8.1
48	2.14286	3.88889
49	3.13333	3.25
50	9	1.66667
51	3	2.4
52	5.33333	2.8
53	7.27273	2.81818
54	6.54545	2
55	7.2	1.85714
56	2.35714	2.23077
57	10.1	3.47059
58	4.4	1.84211
59	6.21429	2.92308
60	12.375	5.38462
61	12	4.46667
62	9.375	2.25
63	4.09091	2.58333
64	8.4	2.4
65	6.61538	1.8
66		8.28571
67		2.05556
68		3.55
69		1.61538
70		4.23077
71		14.8333
72		2.5
73		2.5625
74		3.68421
75		4.11111
76		7.06667
77		2.52941
78		5.81818
79		2.375
80		2.8125
81		7
82		3
83		3.92857
84		5.22222
85		5.70588
86		4.21429
87		3
88		8.16667
89		3.66667
90		6.33333
91		1.93333
92		2
93		3.125
94		3.08333
95		3.625
96		5.625
Mean	6.528	3.532
SEM	0.4524	0.2038

## Sheet: 7I
	ERK active cell (%)
	day 2		day 7
Aggregate	Control (IgG)	AllB2	Control (IgG)	AIIB2
1	71.6418	20	75.3589	28
2	83.7209	14.2857	71.3918	41.2587
3	43.9024	40	73.5409	36.25
4	62.9032	27.5862	78.1955	47.3684
5	70.4918	26.6667	68.1928	37.9747
6	68.1818	53.3333	69.8324	25
7	70.9677	33.3333	67.0213	45.4545
8	73.1707	46.6667	72.4138	34.1463
9	63.1579	20	82	42.3077
10	77.4194	38.8889	77.7778	27.381
11	77.5	33.3333	64.9351	37.037
12	53.8462	30.4348	75	44.4444
13	58.3333	47.8261	52.9412	45.098
14	54.4304	42.8571	65.9341	38.8889
15	60	27.2727	69.0265	41.6667
16	75.6098	30	72.1805	35.2941
17	53.4483	28.5714	70.7071	18.9655
18	84.6154	46.1538	63.5514	25.2874
19	68.4211	45.4545	78.5185
20		50	82.4
21		47.0588
Mean	66.93	35.7	71.55	36.21
SEM	2.523	2.434	1.554	1.941
